# MIND TO MIND

*Creative writing that explores the abstract side  
of our profession and our lives*

Carol Wiley Cassella, M.D., Editor

## Waiting

James M. Berry, M.D.

W

Waiting ...

At night, on call

time slows, almost stops

In the silence, come thoughts

unbidden, of lost

opportunities, things done and not done

In the dark, sleepless ...

Until the rhythmic throb of the rotor blades

heralds the arrival of

another life, shattered ...

---

From the Vanderbilt University School of Medicine, Nashville, Tennessee. james.berry@vanderbilt.edu

Accepted for publication April 9, 2014.

Copyright © 2014, the American Society of Anesthesiologists, Inc. Lippincott Williams & Wilkins. Anesthesiology 2014; 121:899
